# Supplementary material for: Control of cyclic stability and volume expansion on graphite–SiOx–C hierarchical structure for Li-ion battery anodes
Source: Royal Society of Chemistry journal article supplement (doi:10.1039/d1ra08901c), 2022-01-01
Supplement: d1ra08901c1.pdf [file d1ra08901c1.pdf]

## **Supplementary Information**

### **Control of Cyclic Stability and Volume Expansion on Graphite-SiO<sub>x</sub>-C Hierarchical Structure for Li-Ion Battery Anodes**

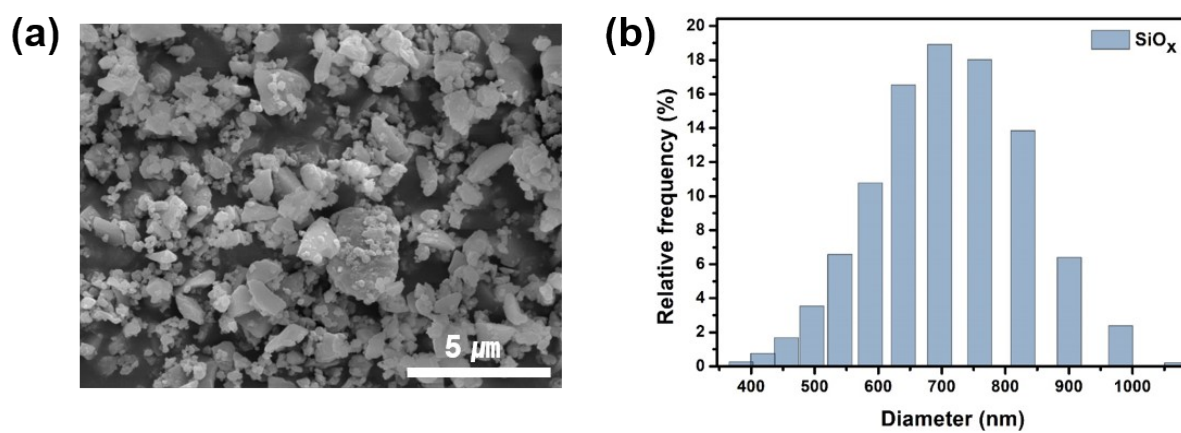

**Fig. S1** (a) SEM image of  $\text{SiO}_x$  particles. (b) Particle sized distribution of  $\text{SiO}_x$  particles.

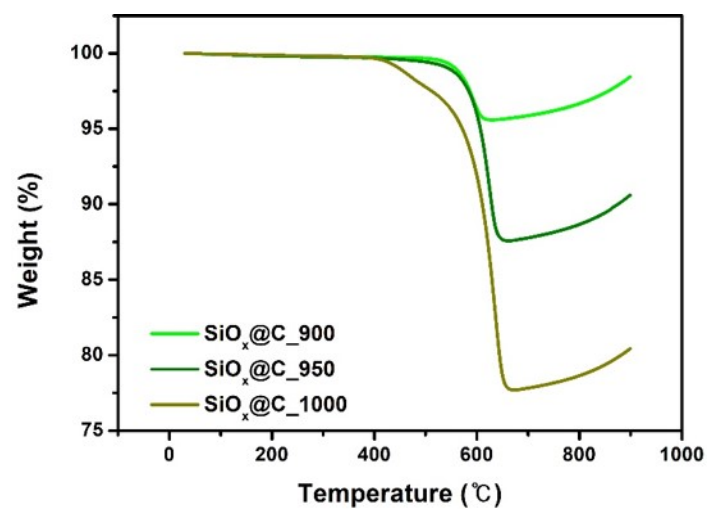

**Fig. S2** TG curves of SiO<sub>x</sub>@C\_900, SiO<sub>x</sub>@C\_950, SiO<sub>x</sub>@C\_1000.

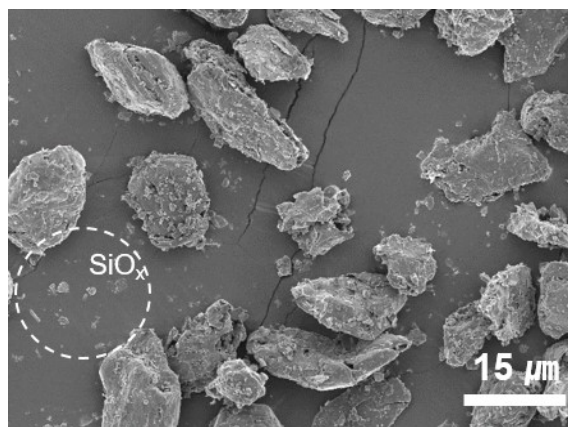

**Fig. S3** SEM image of  $\text{SiO}_x@G$  without acid treatment.

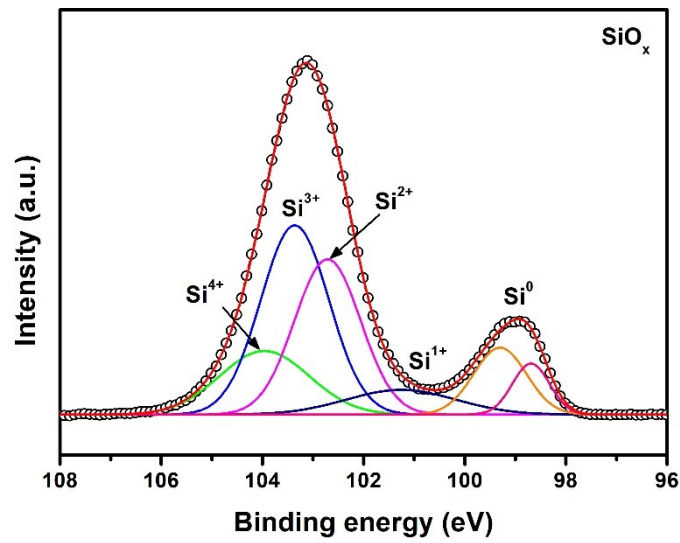

**Fig. S4** Si 2p XPS spectra of  $\text{SiO}_x$ , deconvoluted to the individual silicon oxidated state.

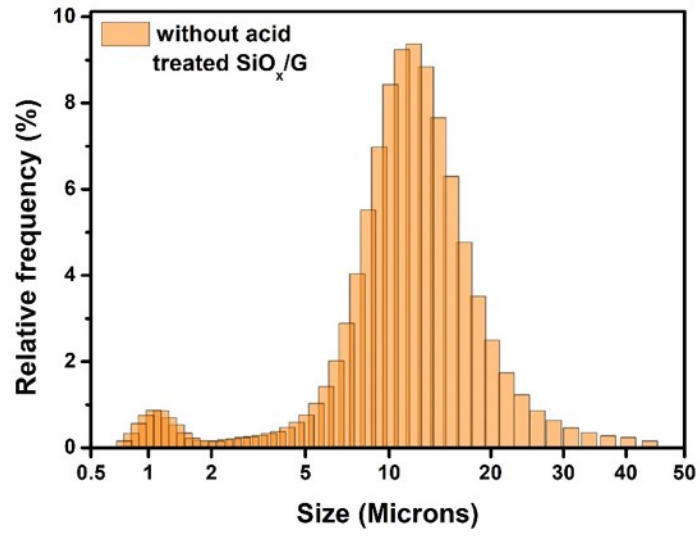

**Fig. S5** PSD curve of SiO<sub>x</sub>/G without acid treatment.

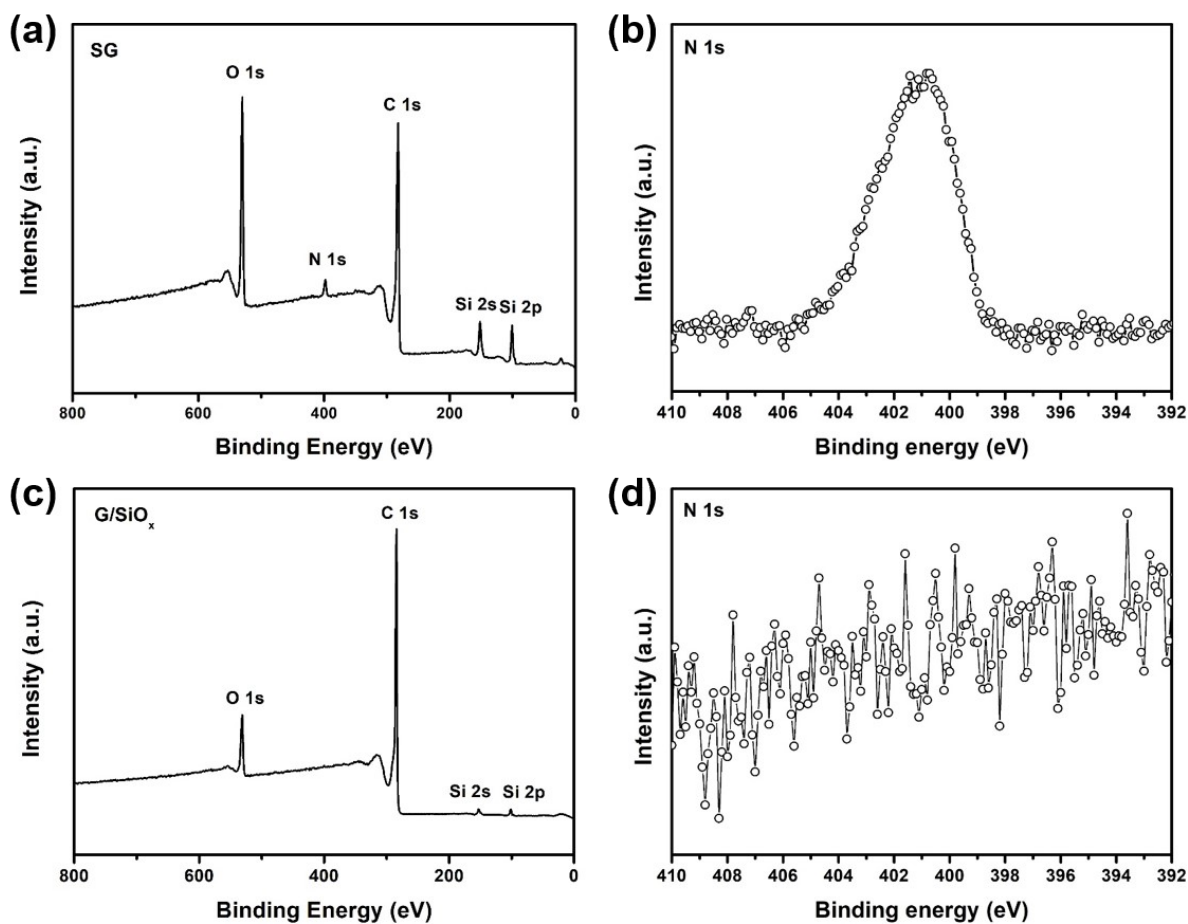

**Fig. S6** XPS spectra of SG, G/SiO<sub>x</sub>. (a) full survey of SG and (b) branched N 1s, (c) full survey of G/SiO<sub>x</sub> and (d) branched XPS spectra of N 1s.

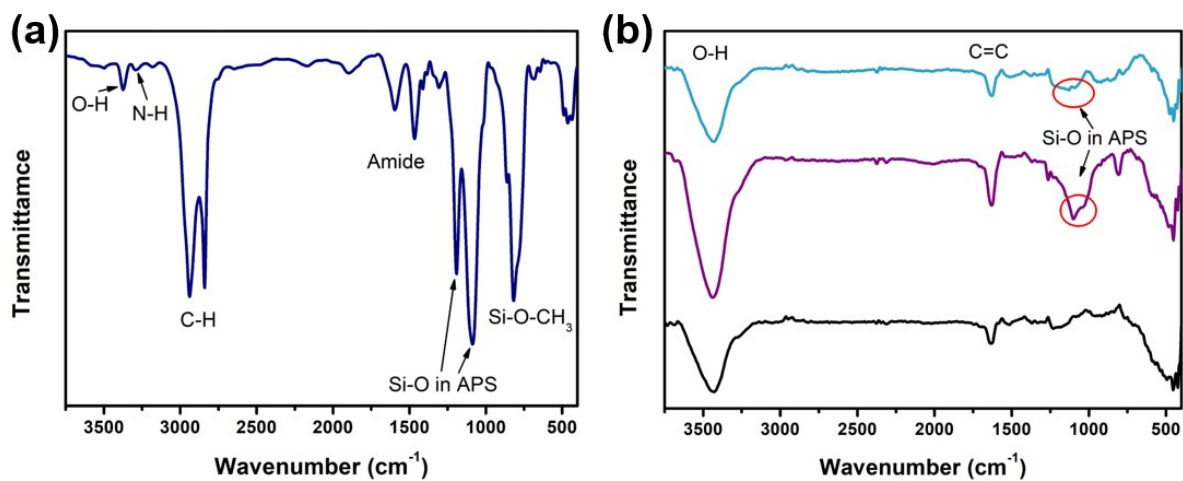

**Fig. S7** FT-IR spectra of (a) APS and (b) G, SG, and MSG.



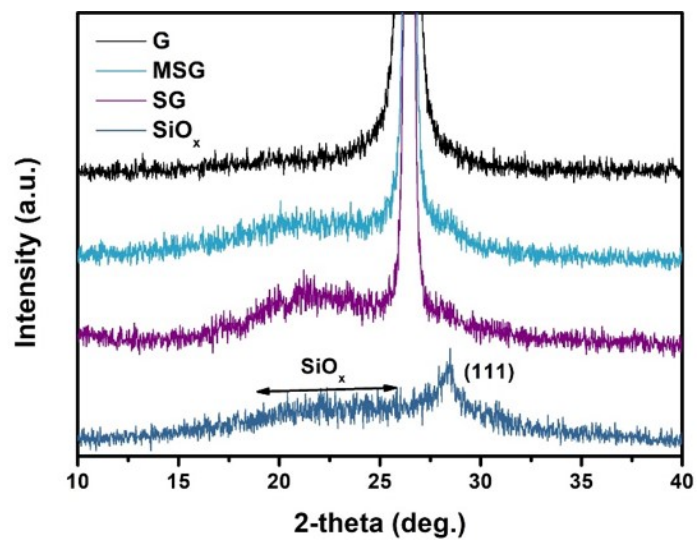

Fig. S8 XRD patterns of G, G/SiO<sub>x</sub>, SG, MSG.

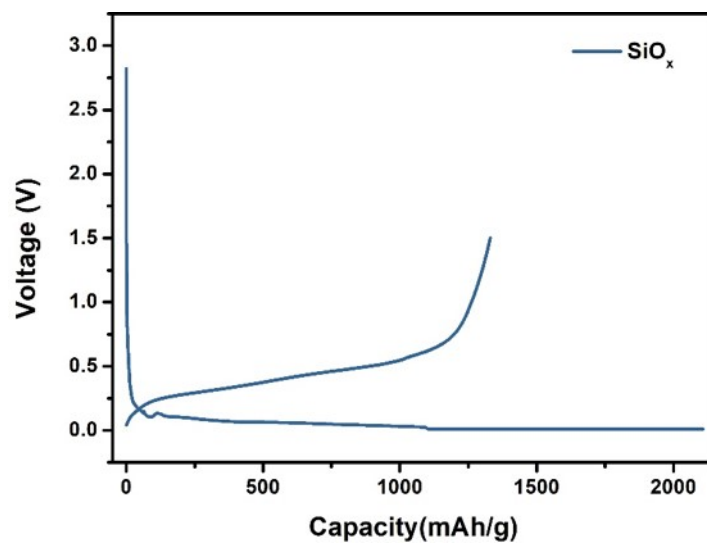

**Fig. S9** 1<sup>st</sup> cycle charge/discharge profile of pristine SiO<sub>x</sub>

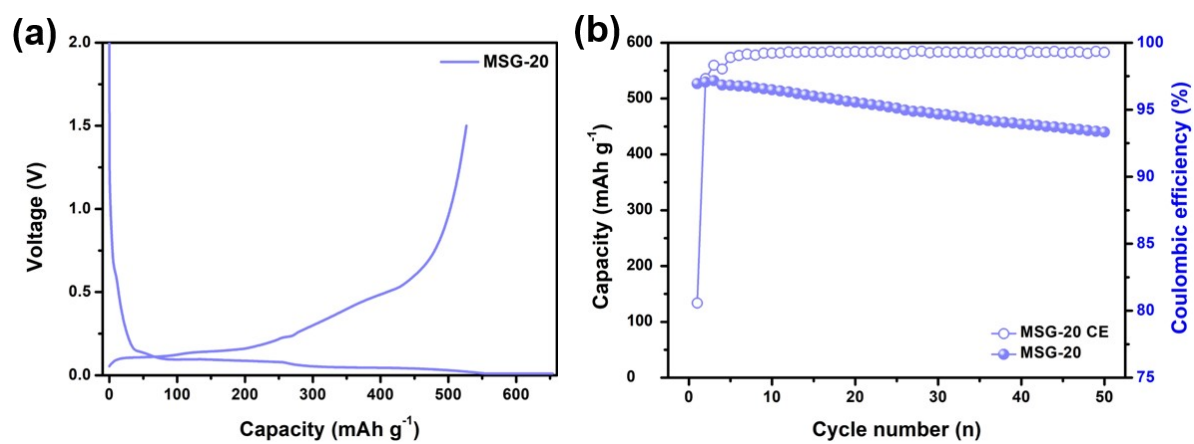

**Fig. S10** (a) Galvanostatic charge/discharge voltage profile of MSG-20. (b) Discharge capacity

of 50 cycles at current density of 0.5C with coulombic efficiency.

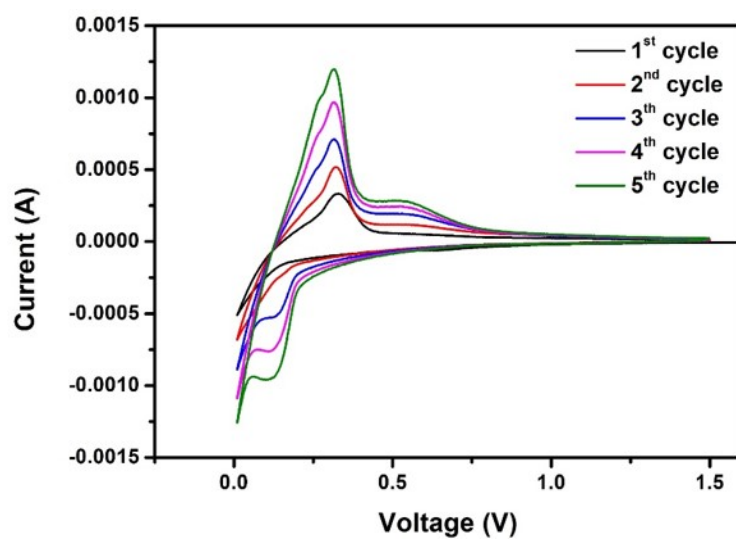

**Fig. S11** CV curves of SG at a scan rate of 0.1 mV s<sup>-1</sup>

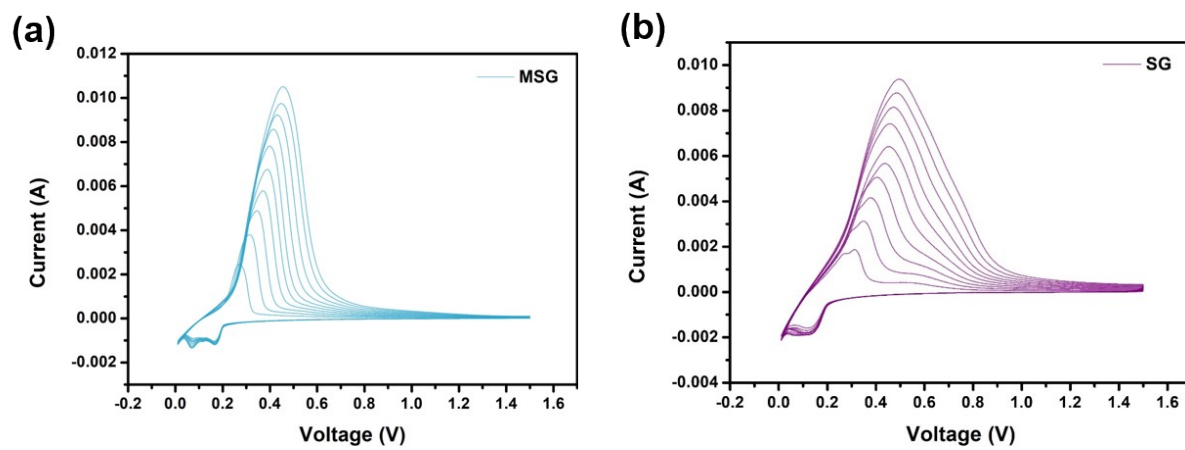

**Fig. S12** CV curves of (a) MSG, (b) SG at scan rates of 0.1-1.0  $\text{mV s}^{-1}$

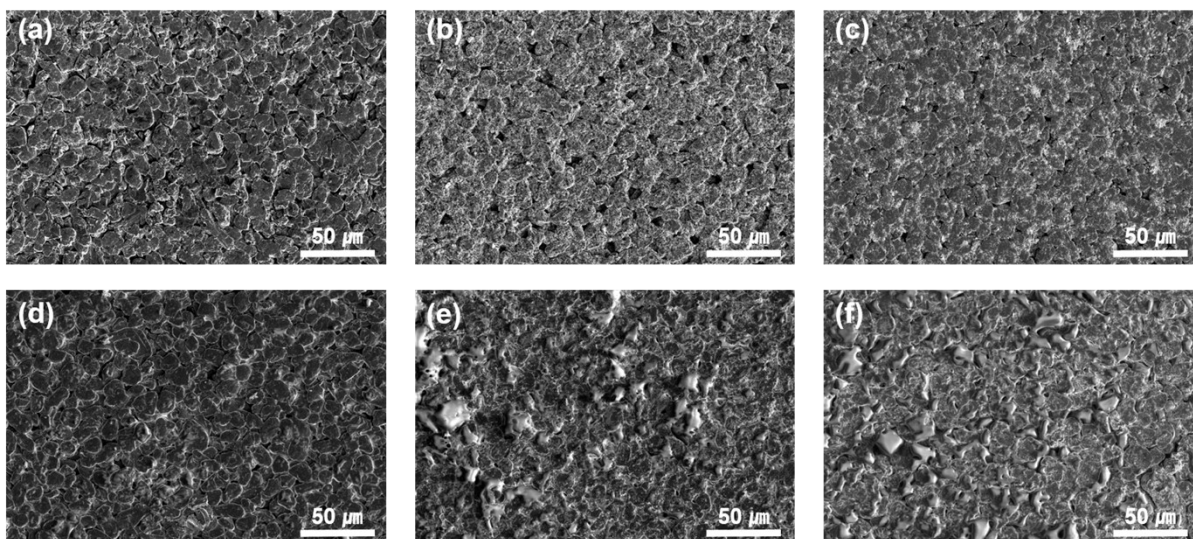

**Fig. S13** Top SEM images of the (a and d) G, (b and e) SG, (c and f) MSG electrodes (a-c) before cycling and (d-f) after 50<sup>th</sup> cycles, respectively .

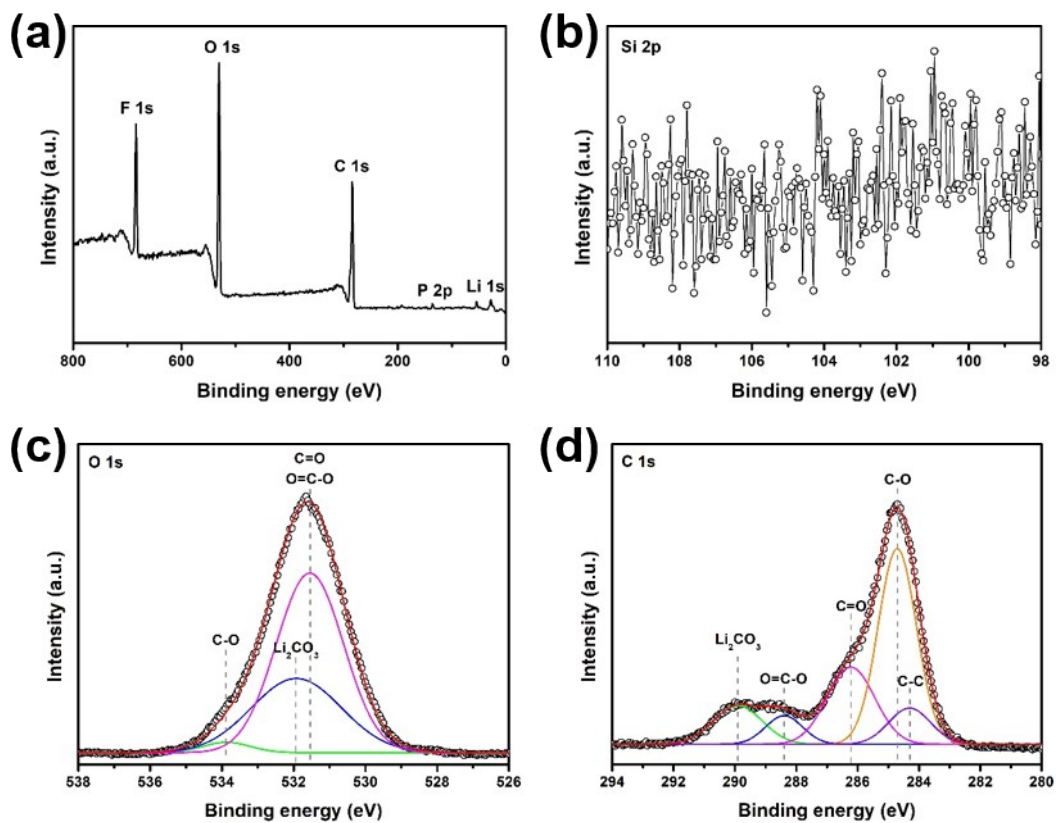

**Fig. S14** XPS spectra of SG electrodes after 50 cycles. (a) overall XPS spectra and branched XPS spectra of (b) Si 2p, (c) O 1s and (d) C 1s.

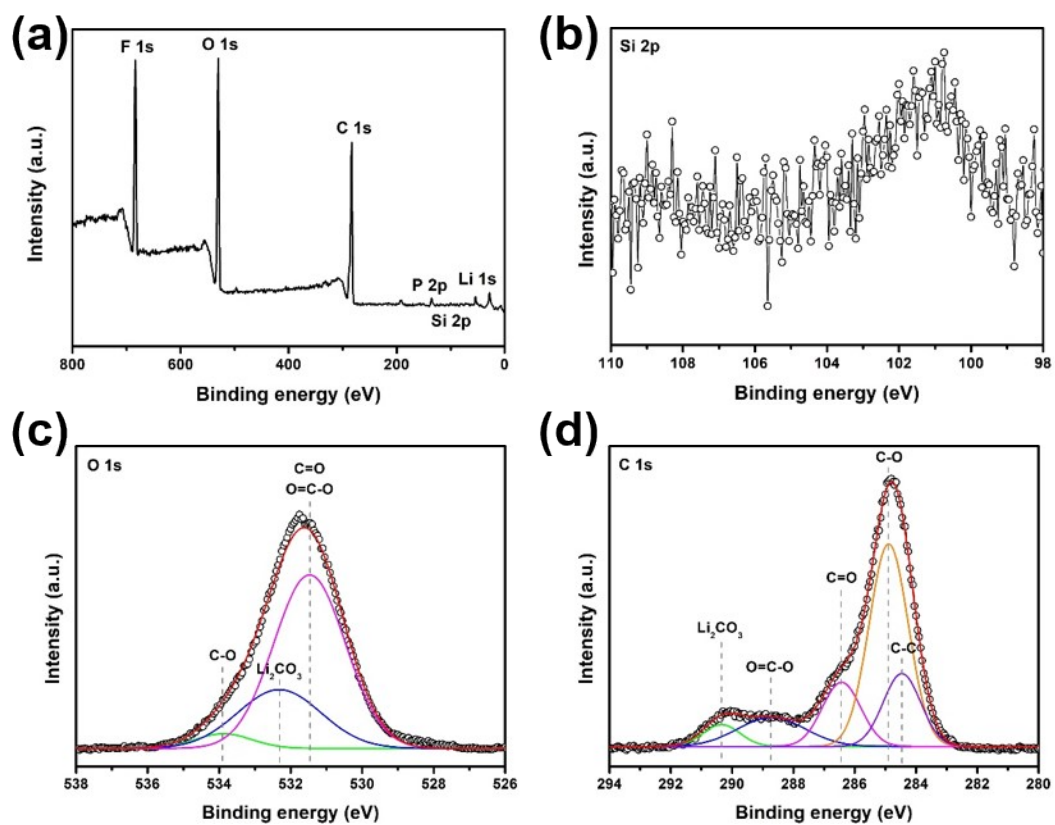

**Fig. S15** XPS spectra of MSG electrodes after 50 cycles. (a) overall XPS spectra and branched XPS spectra of (b) Si 2p, (c) O 1s and (d) C 1s.

**Table S1.** (a) Estimated areal ratio of SiO<sub>x</sub> and (b) oxygen content of SiO<sub>x</sub>.

(a)

| Oxidation state | Si <sup>4+</sup> | Si <sup>3+</sup> | Si <sup>2+</sup> | Si <sup>1+</sup> | Si <sup>0</sup> |
|-----------------|------------------|------------------|------------------|------------------|-----------------|
| Areal ratio (%) | 15.42            | 34.87            | 27.71            | 7.32             | 14.67           |

(b)

| Oxygen content        | SiO <sub>x</sub> |
|-----------------------|------------------|
| x in SiO <sub>x</sub> | 1.14             |



**Table S2.** The measured resistance and Li diffusion coefficient of SG and MSG electrodes.

| <b>Sample</b> | <b><math>R_b</math> (<math>\Omega</math>)</b> | <b><math>R_{SEI}</math> (<math>\Omega</math>)</b> | <b><math>R_{ct}</math> (<math>\Omega</math>)</b> | <b><math>D_{Li^+}</math> (<math>cm^2 s^{-1}</math>)</b> |
|---------------|-----------------------------------------------|---------------------------------------------------|--------------------------------------------------|---------------------------------------------------------|
| <b>SG</b>     | 2.16                                          | 3.00                                              | 12.57                                            | $1.04 \times 10^{-9}$                                   |
| <b>MSG</b>    | 1.90                                          | 2.61                                              | 8.30                                             | $3.63 \times 10^{-9}$                                   |
